# Supplementary material for: Dual protein kinase and nucleoside kinase modulators for rationally designed polypharmacology
Source: PubMed Central journal article supplement (PMC5681654; doi:10.1038/s41467-017-01582-5), 2017-11-10
Supplement: 41467_2017_1582_MOESM3_ESM.pdf [file 41467_2017_1582_MOESM3_ESM.pdf]

## **Descriptions of Additional Supplementary Files**

File Name: Supplementary Dataset 1

Descriptions: Identification of masitinib targets by mass spectrometry on HMC-1.1 cellular lysates.

File Name: Supplementary Dataset 2

Descriptions: Relative quantification of masitinib associated proteins by mass spectrometry on HMC-1.1 cellular lysates.

File Name: Supplementary Dataset 3

Descriptions: Identification of masitinib targets by mass spectrometry on HRT18 cellular lysates.

File Name: Supplementary Dataset 4

Descriptions: Relative quantification of masitinib associated proteins by mass spectrometry on HRT18 cellular lysates.
